# Supplementary material
Source: PubMed Central journal article supplement (PMC5062605)
Supplement: NIHMS818068-supplement-supplemental.pdf [file NIHMS818068-supplement-supplemental.pdf]

## Supplementary Online Content

Grant BF, Saha TD, Ruan WJ, et al. Epidemiology of *DSM-5* drug use disorder: results from the National Epidemiologic Survey on Alcohol and Related Conditions–III. *JAMA Psychiatry*. Published online November 18, 2015.  
doi:10.1001/jamapsychiatry.2015.2132.

**eTable.** 12-Month and Lifetime Prevalences of Specific *DSM -5* Drug Use Disorders Among Men and Women

This supplementary material has been provided by the authors to give readers additional information about their work.

**eTable. 12-Month and Lifetime Prevalences of Specific DSM -5 Drug Use Disorders Among Men and Women**

| Drug Use Disorders          | Prevalence, % (SE) |             |             |            |             |            |
|-----------------------------|--------------------|-------------|-------------|------------|-------------|------------|
|                             | 12-Month           |             |             | Lifetime   |             |            |
|                             | Total              | Men         | Women       | Total      | Men         | Women      |
| Any drug                    | 3.9 (0.13)         | 4.9 (0.22)  | 3.0 (0.16)  | 9.9 (0.27) | 12.3 (0.39) | 7.7 (0.28) |
| Sedatives/<br>tranquilizers | 0.4 (0.03)         | 0.3 (0.05)  | 0.4 (0.06)  | 1.1 (0.07) | 1.1 (0.09)  | 1.1 (0.10) |
| Cannabis                    | 2.5 (0.11)         | 3.5 (0.19)  | 1.7 (0.13)  | 6.3 (0.23) | 8.4 (0.34)  | 4.3 (0.23) |
| Opioids                     | 0.9 (0.05)         | 0.9 (0.08)  | 0.09 (0.08) | 2.1 (0.09) | 2.2 (0.13)  | 1.9 (0.12) |
| Cocaine                     | 0.4 (0.03)         | 0.5 (0.06)  | 0.2 (0.04)  | 2.4 (0.10) | 3.0 (0.17)  | 1.8 (0.12) |
| Stimulants                  | 0.3 (0.03)         | 0.3 (0.05)  | 0.3 (0.04)  | 1.7 (0.10) | 1.9 (0.14)  | 1.6 (0.13) |
| Hallucinogen                | 0.05 (0.01)        | 0.06 (0.01) | 0.04 (0.01) | 0.6 (0.06) | 0.8 (0.10)  | 0.4 (0.05) |
| Inhalants/<br>solvents      | 0.04 (0.02)        | 0.08 (0.04) | 0.01 (0.01) | 0.2 (0.03) | 0.2 (0.05)  | 0.1 (0.03) |
| Club drugs                  | 0.1 (0.02)         | 0.2 (0.03)  | 0.1 (0.02)  | 0.5 (0.04) | 0.6 (0.07)  | 0.4 (0.05) |
| Heroin                      | 0.1 (0.03)         | 0.2 (0.05)  | 0.1 (0.03)  | 0.5 (0.05) | 0.7 (0.08)  | 0.3 (0.04) |
| Other                       | 0.03 (0.01)        | 0.01 (0.00) | 0.06 (0.02) | 0.1 (0.02) | 0.1 (0.03)  | 0.1 (0.02) |
